# Supplementary material
Source: Springer Nature journal article supplement (https://www.springermedizin.de/resource/supplementary/12913_2013_3057_MOESM2_ESM.pdf/9532250)

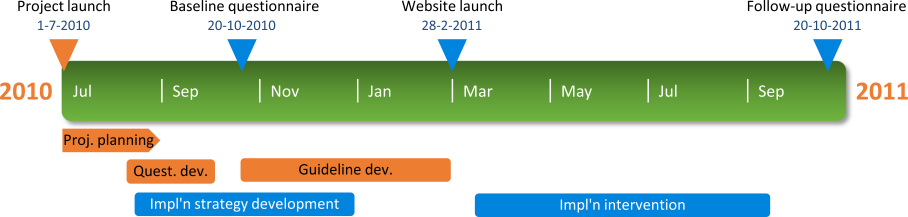

Supplement: MOESM2 [file 9532250]
